# Supplementary material for: Prenatal Factors Associated with Maternal Cardiometabolic Risk Markers during Pregnancy: The ECLIPSES Study
Source: MDPI journal article supplement (doi:10.3390/nu15051135), 2023-02-23
Supplement: s1 [file s1]

**Supplementary Table S1.** Comparisons of selected sociodemographic and lifestyle characteristics† of pregnant women for single risk factors and cardiometabolic risk scores in the first trimester of pregnancy

| Characteristics                               | Cardiometabolic risk biomarkers in the first trimester |                                 |                     |                    |                      |                      |                         |                     |                     |                              |
|-----------------------------------------------|--------------------------------------------------------|---------------------------------|---------------------|--------------------|----------------------|----------------------|-------------------------|---------------------|---------------------|------------------------------|
|                                               | BMI (kg/m <sup>2</sup> )                               | SBP (mm Hg)                     | DBP (mm Hg)         | Glucose (mg/dL)    | Insulin (mU/L) ‡     | HOMA-IR‡             | Triglycerides (mg/dL) ‡ | HDL-c (mg/dL)       | LDL-c (mg/dL)       | CCR-z score§                 |
|                                               | n=265<br>Mean ± SD                                     | n=264 <sup>a</sup><br>Mean ± SD | n=264<br>Mean ±SD   | n=265<br>Mean ± SD | n=265<br>Mean ± SD   | n=265<br>Mean ± SD   | n=265<br>Mean ± SD      | n=265<br>Mean ± SD  | n=265<br>Mean ± SD  | n=264<br>Mean ± SD           |
| All                                           | 24.1 ± 3.5                                             | 112.3 ± 11.8                    | 66.4 ± 7.7          | 70.2 ± 10.7        | 7.77 ± 1.76          | 1.32 ± 1.85          | 83.1 ± 1.4              | 61.2 ± 13.0         | 88.2 ± 25.5         | -1.5×10 <sup>-3</sup> ± 3.54 |
| Age categories (years)                        |                                                        |                                 |                     |                    |                      |                      |                         |                     |                     |                              |
| <25                                           | 23.9 ± 4.4                                             | 111.5 ± 13.0                    | 64.9 ± 7.7          | 67.7 ± 10.6        | 8.25 ± 1.80          | 1.36 ± 1.93          | 85.6 ± 1.5              | 55.9 ± 11.5         | 86.8 ± 28.9         | 0.07 ± 3.66                  |
| 25-29                                         | 23.7 ± 3.0                                             | 111.7 ± 12.8                    | 66.1 ± 7.6          | 70.4 ± 11.3        | 6.89 ± 1.71          | 1.18 ± 1.84          | 79.0 ± 1.5              | 61.4 ± 14.0         | 85.1 ± 22.3         | -0.59 ± 3.42                 |
| ≥30                                           | 24.3 ± 3.4                                             | 112.8 ± 11.0                    | 66.9 ± 7.7          | 70.8 ± 10.4        | 8.00 ± 1.78          | 1.39 ± 1.85          | 83.9 ± 1.4              | <b>62.6 ± 12.5*</b> | 90.0 ± 25.9         | 0.26 ± 3.55                  |
| BMI categories (kg/m <sup>2</sup> )           |                                                        |                                 |                     |                    |                      |                      |                         |                     |                     |                              |
| <25 (normal weight)                           | 21.9 ± 1.7                                             | 110.3 ± 11.7                    | 65.0 ± 7.5          | 69.5 ± 10.4        | 6.89 ± 1.75          | 1.16 ± 1.84          | 79.0 ± 1.4              | 62.1 ± 13.0         | 85.6 ± 24.1         | -1.33 ± 2.94                 |
| ≥25 (overweight /obesity)                     | <b>27.8 ± 1.7**</b>                                    | <b>115.9 ± 11.7**</b>           | <b>68.9 ± 7.5**</b> | 71.4 ± 10.4        | <b>9.49 ± 1.69**</b> | <b>1.64 ± 1.78**</b> | <b>89.1 ± 1.4*</b>      | 59.7 ± 13.0         | <b>92.8 ± 25.2*</b> | <b>2.36 ± 3.27*</b>          |
| Educational level                             |                                                        |                                 |                     |                    |                      |                      |                         |                     |                     |                              |
| Low (primary or below)/<br>Medium (secondary) | 24.5 ± 3.5                                             | 113.6 ± 11.9                    | 66.8 ± 7.6          | 70.5 ± 11.4        | 8.00 ± 1.78          | 1.37 ± 1.89          | 84.7 ± 1.4              | 59.7 ± 13.2         | 87.6 ± 20.0         | 0.45 ± 3.41                  |
| High (university or above)                    | <b>23.2 ± 3.3*</b>                                     | <b>109.6 ± 11.1*</b>            | 65.5 ± 7.9          | 69.5 ± 9.0         | 7.24 ± 1.73          | 1.23 ± 1.78          | 75.9 ± 1.5              | <b>64.6 ± 12.1*</b> | 89.3 ± 34.5         | <b>-0.99 ± 3.64*</b>         |
| Social class                                  |                                                        |                                 |                     |                    |                      |                      |                         |                     |                     |                              |
| Low                                           | 25.4 ± 3.8                                             | 112.6 ± 13.9                    | 67.2 ± 6.4          | 70.5 ± 15.6        | 9.97 ± 1.71          | 1.68 ± 1.85          | 87.3 ± 1.5              | 58.3 ± 12.9         | 86.7 ± 18.8         | 1.18 ± 3.13                  |
| Medium/high                                   | <b>23.9 ± 3.4*</b>                                     | 112.3 ± 11.5                    | 66.3 ± 7.9          | 70.1 ± 9.8         | <b>7.46 ± 1.76*</b>  | <b>1.27 ± 1.85*</b>  | 81.4 ± 1.4              | 61.7 ± 13.0         | 88.4 ± 26.4         | <b>-0.18 ± 3.57*</b>         |
| Smoking status                                |                                                        |                                 |                     |                    |                      |                      |                         |                     |                     |                              |
| Never smoker                                  | 24.2 ± 3.7                                             | 112.9 ± 12.0                    | 66.7 ± 7.5          | 69.6 ± 11.4        | 8.00 ± 1.80          | 1.34 ± 1.91          | 84.7 ± 1.5              | 61.6 ± 13.7         | 89.6 ± 27.3         | 0.18 ± 3.81                  |
| Current/former smoker                         | 23.7 ± 3.0                                             | 110.9 ± 11.4                    | 65.5 ± 8.2          | 71.5 ± 8.5         | 7.32 ± 1.71          | 1.28 ± 1.76          | <b>75.9 ± 1.4*</b>      | 60.4 ± 11.3         | 84.8 ± 20.4         | -0.44 ± 2.78                 |
| Alcohol consumption                           |                                                        |                                 |                     |                    |                      |                      |                         |                     |                     |                              |
| No                                            | 24.2 ± 3.6                                             | 112.0 ± 11.4                    | 66.4 ± 7.4          | 70.3 ± 11.1        | 7.92 ± 1.80          | 1.34 ± 1.89          | 83.0 ± 1.5              | 61.1 ± 13.0         | 88.1 ± 24.7         | 0.08 ± 3.68                  |
| Yes                                           | 23.6 ± 3.0                                             | 114.2 ± 13.8                    | 67.5 ± 9.5          | 69.9 ± 8.5         | 7.32 ± 1.68          | 1.25 ± 1.71          | 78.2 ± 1.4              | 61.9 ± 13.8         | 89.3 ± 30.1         | -0.26 ± 2.96                 |
| PA (METs-min/week)                            |                                                        |                                 |                     |                    |                      |                      |                         |                     |                     |                              |
| T1                                            | 24.3 ± 3.6                                             | 112.8 ± 11.4                    | 67.6 ± 7.7          | 69.9 ± 8.9         | 7.92 ± 1.78          | 1.36 ± 1.89          | 87.3 ± 1.4              | 61.1 ± 13.0         | 91.8 ± 28.6         | 0.47 ± 3.60                  |
| T2                                            | 24.4 ± 3.6                                             | 112.7 ± 12.6                    | 65.9 ± 7.9          | 70.2 ± 11.6        | 8.00 ± 1.80          | 1.37 ± 1.87          | 83.0 ± 1.4              | 60.5 ± 13.3         | 89.1 ± 23.6         | 0.23 ± 3.61                  |
| T3                                            | <b>23.1 ± 3.0*</b>                                     | 110.9 ± 10.9                    | 65.6 ± 7.2          | 70.6 ± 11.4        | 7.03 ± 1.69          | 1.20 ± 1.78          | 75.9 ± 1.4              | 62.9 ± 12.4         | <b>80.9 ± 22.9*</b> | <b>-1.14 ± 3.11*</b>         |
| rMedDiet score (point)                        |                                                        |                                 |                     |                    |                      |                      |                         |                     |                     |                              |
| T1                                            | 24.4 ± 4.0                                             | 113.0 ± 11.7                    | 66.7 ± 7.3          | 69.7 ± 10.0        | 8.08 ± 1.82          | 1.37 ± 1.85          | 78.25 ± 1.4             | 60.8 ± 11.8         | 87.8 ± 20.9         | 0.03 ± 3.45                  |
| T2                                            | 23.7 ± 3.1                                             | 111.4 ± 12.1                    | 66.2 ± 7.6          | 70.2 ± 11.9        | 7.85 ± 1.73          | 1.33 ± 1.82          | 83.93 ± 1.4             | 61.2 ± 13.4         | 90.3 ± 31.5         | -0.01 ± 3.80                 |

|    |            |              |            |             |             |             |             |             |             |             |
|----|------------|--------------|------------|-------------|-------------|-------------|-------------|-------------|-------------|-------------|
| T3 | 24.3 ± 3.4 | 112.8 ± 11.1 | 66.8 ± 8.7 | 71.2 ± 10.0 | 7.39 ± 1.84 | 1.29 ± 2.01 | 87.35 ± 1.4 | 61.9 ± 14.5 | 85.1 ± 18.2 | 0.14 ± 3.44 |
|----|------------|--------------|------------|-------------|-------------|-------------|-------------|-------------|-------------|-------------|

Values are expressed in means ± SD (standard deviation). Abbreviations: BMI, body mass index; PA, Physical Activity; METs, metabolic equivalents; T, tertile; rMedDiet, Mediterranean diet; SBP, systolic blood pressure; DBP, diastolic blood pressure; HOMA-IR, Homeostatic Model Assessment for Insulin Resistance; HDL-c, high-density lipoprotein-cholesterol; LDL-c, low-density lipoprotein-cholesterol; CCR, clustered cardiometabolic risk. The significance of the numbers in bold is  $p$ -value < 0.05. \* $p$ <0.05 and \*\* $p$ <0.001 compared with the first category as derived from ANOVA or Student's T-test, as appropriate. †In the first trimester of pregnancy. ‡Geometric means of log-transformed values. §A higher clustered cardiometabolic status signifies higher cardiometabolic risk.

**Supplementary Table S2.** Comparisons of selected sociodemographic and lifestyle characteristics† of pregnant women for single risk factors and cardiometabolic risk scores in the third trimester of pregnancy

| Characteristics            | Cardiometabolic risk biomarkers in the third trimester |                       |                     |                     |                      |                                |                         |                    |                      |                             |
|----------------------------|--------------------------------------------------------|-----------------------|---------------------|---------------------|----------------------|--------------------------------|-------------------------|--------------------|----------------------|-----------------------------|
|                            | BMI (kg/m <sup>2</sup> )                               | SBP (mm Hg)           | DBP (mm Hg)         | Glucose (mg/dL)     | Insulin (mU/L) ‡     | HOMA-IR‡                       | Triglycerides (mg/dL) ‡ | HDL-c (mg/dL)      | LDL-c (mg/dL)        | CCR-z score§                |
|                            | n=219<br>Mean ± SD                                     | n=215<br>Mean ± SD    | n=215<br>Mean ±SD   | n=219<br>Mean ± SD  | n=219<br>Mean ± SD   | n=219<br>Mean ± SD             | n=219<br>Mean ± SD      | n=219<br>Mean ± SD | n=219<br>Mean ± SD   | n=215<br>Mean ± SD          |
| All                        | 27.8 ± 3.3                                             | 113.7 ± 11.0          | 68.8 ± 8.6          | 67.3 ± 10.0         | 8.58 ± 1.82          | 1.40 ± 1.91                    | 170.7 ± 1.6             | 65.7 ± 14.1        | 131.2 ± 35.8         | 2.2x10 <sup>-3</sup> ± 3.12 |
| Age (years)                |                                                        |                       |                     |                     |                      |                                |                         |                    |                      |                             |
| <25                        | 27.1 ± 3.1                                             | 114.58 ± 12.3         | 69.9 ± 8.8          | 66.7 ± 7.5          | 10.38 ± 1.71         | 1.70 ± 1.80                    | 172.4 ± 1.6             | 63.0 ± 12.4        | 123.1 ± 42.6         | 0.14 ± 3.12                 |
| 25-29                      | 27.8 ± 3.3                                             | 112.97 ± 10.9         | 69.2 ± 8.2          | 67.3 ± 9.6          | 8.67 ± 1.91          | 1.43 ± 2.01                    | 170.7 ± 1.6             | 67.0 ± 14.6        | 128.4 ± 30.9         | -0.15 ± 3.03                |
| ≥30                        | 27.9 ± 3.3                                             | 113.90 ± 10.8         | 68.4 ± 8.8          | 67.5 ± 10.8         | 8.08 ± 1.78          | 1.34 ± 1.88                    | 170.7 ± 1.7             | 65.7 ± 14.3        | 134.7 ± 36.0         | 0.04 ± 3.18                 |
| BMI (kg/m <sup>2</sup> )   |                                                        |                       |                     |                     |                      |                                |                         |                    |                      |                             |
| <25 (normal weight)        | 25.9 ± 2.0                                             | 112.7 ± 10.7          | 67.7 ± 8.1          | 67.2 ± 9.06         | 8.00 ± 1.85          | 1.31 ± 1.93                    | 164.0 ± 1.6             | 66.7 ± 14.2        | 131.3 ± 34.2         | -0.96 ± 2.78                |
| ≥25 (overweight/obesity)   | <b>31.9 ± 2.3**</b>                                    | 115.5 ± 11.4          | <b>70.9 ± 9.2*</b>  | 67.5 ± 11.6         | <b>9.77 ± 1.69*</b>  | <b>1.60 ± 1.84*</b>            | 183.1 ± 1.6             | 63.75 ± 13.7       | 131.0 ± 38.8         | <b>1.81 ± 2.91*</b>         |
| IOM GWG recommendations¶   |                                                        |                       |                     |                     |                      |                                |                         |                    |                      |                             |
| Insufficient               | 25.9 ± 2.3                                             | 110.6 ± 9.6           | 66.3 ± 8.3          | 65.9 ± 9.4          | 7.84 ± 1.84          | 1.27 ± 1.93                    | 170.7 ± 1.6             | 66.3 ± 13.1        | 130.2 ± 34.2         | -1.21 ± 2.77                |
| Adequate                   | <b>28.2 ± 2.6**</b>                                    | <b>114.6 ± 11.2*</b>  | <b>70.4 ± 8.2*</b>  | 69.1 ± 11.4         | 8.75 ± 1.87          | 1.46 ± 1.99                    | 165.7 ± 1.7             | 63.2 ± 14.3        | 132.2 ± 38.4         | <b>0.64 ± 3.19*</b>         |
| Excessive                  | <b>32.1 ± 2.7**</b>                                    | <b>120.6 ± 11.3**</b> | <b>72.9 ± 8.2**</b> | 67.4 ± 7.7          | <b>10.60 ± 1.55*</b> | <b>1.75 ± 1.58<sup>a</sup></b> | 181.3 ± 1.5             | 69.4 ± 15.6        | 132.0 ± 35.5         | <b>2.12 ± 2.27*</b>         |
| Educational level          |                                                        |                       |                     |                     |                      |                                |                         |                    |                      |                             |
| Low (primary or below)/    |                                                        |                       |                     |                     |                      |                                |                         |                    |                      |                             |
| Medium (secondary)         | 28.2 ± 3.2                                             | 113.9 ± 11.1          | 69.0 ± 8.6          | 68.0 ± 10.1         | 9.20 ± 1.80          | 1.54 ± 1.92                    | 177.7 ± 1.6             | 64.8 ± 14.7        | 128.0 ± 33.3         | 0.38 ± 2.94                 |
| High (university or above) | <b>27.1 ± 3.4*</b>                                     | 113.3 ± 11.0          | 68.5 ± 8.7          | 66.0 ± 9.9          | <b>7.31 ± 1.80*</b>  | <b>1.19 ± 1.86*</b>            | <b>154.5 ± 1.7*</b>     | 67.4 ± 12.8        | <b>138.2 ± 40.0*</b> | <b>-0.76 ± 3.32*</b>        |
| Social class               |                                                        |                       |                     |                     |                      |                                |                         |                    |                      |                             |
| Low                        | 29.0 ± 2.8                                             | 115.0 ± 12.7          | 69.6 ± 8.3          | 72.5 ± 11.2         | 13.06 ± 1.69         | 2.32 ± 1.84                    | 200.3 ± 1.3             | 61.5 ± 9.8         | 130.8 ± 31.4         | 2.38 ± 2.87                 |
| Medium/high                | <b>27.6 ± 3.3*</b>                                     | 113.5 ± 10.8          | 68.7 ± 8.7          | <b>66.6 ± 9.76*</b> | <b>8.08 ± 1.78*</b>  | <b>1.31 ± 1.86*</b>            | <b>165.7 ± 1.6*</b>     | 66.3 ± 14.6        | 131.4 ± 36.6         | <b>-0.35 ± 3.00*</b>        |
| Smoking status             |                                                        |                       |                     |                     |                      |                                |                         |                    |                      |                             |
| Never smoker               | 27.6 ± 3.2                                             | 113.3 ± 11.3          | 68.5 ± 7.8          | 67.4 ± 10.5         | 8.24 ± 1.89          | 1.36 ± 1.99                    | 162.4 ± 1.7             | 64.8 ± 13.6        | 127.9 ± 33.5         | -0.26 ± 3.10                |
| Current/former smoker      | 28.1 ± 3.6                                             | 114.7 ± 10.3          | 69.7 ± 10.4         | 67.2 ± 8.8          | 9.29 ± 1.61          | 1.54 ± 1.68                    | <b>192.5 ± 1.4*</b>     | 67.7 ± 15.2        | <b>139.6 ± 40.0*</b> | <b>0.66 ± 3.07*</b>         |
| Alcohol consumption        |                                                        |                       |                     |                     |                      |                                |                         |                    |                      |                             |
| No                         | 27.9 ± 3.4                                             | 113.1 ± 10.6          | 68.4 ± 8.3          | 67.2 ± 10.3         | 8.67 ± 1.85          | 1.42 ± 1.95                    | 170.7 ± 1.6             | 65.5 ± 14.2        | 129.3 ± 34.5         | -0.63 ± 3.22                |
| Yes                        | 27.1 ± 3.2                                             | <b>117.4 ± 12.8*</b>  | 71.6 ± 8.8          | 68.5 ± 9.0          | 8.08 ± 1.68          | 1.36 ± 1.70                    | 165.7 ± 1.5             | 65.0 ± 15.2        | <b>145.6 ± 42.1*</b> | 0.52 ± 2.60                 |
| PA (METs-min/week)         |                                                        |                       |                     |                     |                      |                                |                         |                    |                      |                             |
| T1                         | 27.8 ± 3.1                                             | 112.7 ± 11.0          | 69.7 ± 8.5          | 67.4 ± 9.5          | 8.08 ± 1.75          | 1.34 ± 1.80                    | 174.2 ± 1.7             | 64.5 ± 15.8        | 133.5 ± 40.4         | 0.13 ± 2.86                 |
| T2                         | 28.2 ± 3.3                                             | 114.9 ± 11.6          | 68.8 ± 8.7          | 68.4 ± 8.5          | 8.67 ± 1.82          | 1.45 ± 1.90                    | 165.7 ± 1.6             | 66.3 ± 13.7        | 130.9 ± 32.9         | 0.23 ± 3.15                 |
| T3                         | 26.8 ± 3.4                                             | 112.7 ± 9.9           | 67.7 ± 8.7          | 65.1 ± 13.0         | 9.11 ± 1.91          | 1.42 ± 2.12                    | 172.4 ± 1.5             | 65.9 ± 12.7        | 128.9 ± 35.3         | -0.63 ± 3.34                |

|                        |            |              |            |             |             |             |             |             |              |              |
|------------------------|------------|--------------|------------|-------------|-------------|-------------|-------------|-------------|--------------|--------------|
| rMedDiet score (point) |            |              |            |             |             |             |             |             |              |              |
| T1                     | 27.6 ± 3.1 | 113.8 ± 11.5 | 68.5 ± 8.7 | 68.5 ± 9.0  | 8.84 ± 1.76 | 1.49 ± 1.84 | 165.7 ± 1.6 | 63.1 ± 12.3 | 134.7 ± 36.7 | 0.33 ± 2.84  |
| T2                     | 27.6 ± 3.3 | 112.7 ± 10.9 | 68.9 ± 8.3 | 66.4 ± 11.5 | 8.49 ± 1.80 | 1.38 ± 1.92 | 170.7 ± 1.6 | 67.3 ± 14.7 | 129.1 ± 35.3 | -0.42 ± 3.23 |
| T3                     | 28.3 ± 3.8 | 115.3 ± 10.5 | 69.5 ± 8.5 | 67.7 ± 8.7  | 8.24 ± 1.97 | 1.36 ± 2.08 | 177.7 ± 1.6 | 65.3 ± 16.0 | 131.7 ± 36.8 | 0.38 ± 3.36  |

Values are expressed in means ± SD (standard deviation). Abbreviations: BMI, body mass index; GWG, gestational weight gain; IOM, Institute of Medicine; PA, Physical Activity; METs, metabolic equivalents; T, tertile; rMedDiet, Mediterranean diet; SBP, systolic blood pressure; DBP, diastolic blood pressure; HOMA-IR, Homeostatic Model Assessment for Insulin Resistance; HDL-c, high-density lipoprotein-cholesterol; LDL-c, low-density lipoprotein-cholesterol; CCR, clustered cardiometabolic risk. The significance of the numbers in bold is  $p$ -value < 0.05. \*  $p$ <0.05 compared with the first category as derived from ANOVA or Student's T-test, as appropriate. \*\*The significance of the numbers in bold is  $p$ -value < 0.001. ¶ Recommendations for GWG according to IOM guidelines are: initial BMI <18.5 kg/m<sup>2</sup>, total weight gain 12.5–18 kg; BMI 18.5–24.9 kg/m<sup>2</sup>, total weight gain 11.5–16 kg; BMI 25.0–29.9 kg/m<sup>2</sup>, total weight gain 7–11.5 kg; and BMI ≥30 kg/m<sup>2</sup>, total weight gain 5–9 kg. †In the first trimester of pregnancy (except for GWG). ‡Geometric means of log-transformed values. §A higher clustered cardiometabolic status signifies higher cardiometabolic risk.
